# Supplementary material for: X-ray absorption spectroscopy shining (synchrotron) light onto the insertion of Zn2+in calcium phosphate ceramics and its influence on their behaviour under biological conditions
Source: Royal Society of Chemistry journal article supplement (doi:10.1039/c3tb21397h), 2013-11-19
Supplement: c3tb21397h.pdf [file c3tb21397h.pdf]

### Supplementary Tables

**Table S1.** Results of the quantitative analyses (wt %) extracted from Rietveld refinements for the undoped BCP series and the two Zn-dopes BCP series. Standard deviations are indicated in parentheses.

| Samples   | Mineralogical composition (wt %) |              |               |                   |          |          |
|-----------|----------------------------------|--------------|---------------|-------------------|----------|----------|
|           | HAp                              | $\beta$ -TCP | $\alpha$ -CDP | CaCO <sub>3</sub> | CaO      | ZnO      |
| 00Zn-500  | 91.2 (9)                         | -            | 4.4 (3)       | 3.70 (15)         | 0.79 (9) | -        |
| 00Zn-600  | 88.1 (9)                         | 2.9 (3)      | 7.2 (3)       | 0.86 (9)          | 0.96 (6) | -        |
| 00Zn-700  | 87.1 (9)                         | 7.9 (3)      | 3.9 (3)       | 0.46 (3)          | 0.64 (3) | -        |
| 00Zn-800  | 88.4 (9)                         | 11.1 (3)     | -             | -                 | 0.47 (3) | -        |
| 00Zn-900  | 96.6 (6)                         | 3.2 (3)      | -             | -                 | 0.19 (3) | -        |
| 00Zn-1000 | 98.4 (9)                         | 1.5 (3)      | -             | -                 | 0.11 (3) | -        |
| 00Zn-1100 | 100 (-)                          | -            | -             | -                 | -        | -        |
| 15Zn-500  | 86.3 (9)                         | 2.8 (3)      | 6.4 (3)       | 2.45 (12)         | 1.51 (6) | 0.42 (6) |
| 15Zn-600  | 79.6 (9)                         | 7.2 (6)      | 10.8 (6)      | -                 | 2.18 (9) | 0.28 (6) |
| 15Zn-700  | 70.1 (9)                         | 21.7 (9)     | 6.2 (9)       | 0.4 (2)           | 1.49 (9) | 0.10 (3) |
| 15Zn-800  | 76.6 (9)                         | 22.2 (6)     | -             | -                 | 0.94 (6) | 0.29 (6) |
| 15Zn-900  | 89.3 (6)                         | 10.3 (6)     | -             | -                 | 0.08 (6) | 0.28 (9) |
| 15Zn-1000 | 91.1 (6)                         | 8.9 (6)      | -             | -                 | -        | -        |
| 15Zn-1100 | 92.1 (9)                         | 7.9 (6)      | -             | -                 | -        | -        |
| 20Zn-500  | 84.7 (9)                         | 3.1 (6)      | 7.3 (9)       | 2.6 (2)           | 1.78 (9) | 0.48 (6) |
| 20Zn-600  | 80.7 (9)                         | 5.9 (3)      | 9.7 (6)       | -                 | 3.02 (9) | 0.68 (6) |
| 20Zn-700  | 77.0 (9)                         | 16.7 (3)     | 3.2 (3)       | -                 | 2.63 (9) | 0.46 (6) |
| 20Zn-800  | 82.8 (9)                         | 14.9 (3)     | -             | -                 | 1.45 (6) | 0.84 (9) |
| 20Zn-900  | 94.9 (9)                         | 3.5 (3)      | -             | -                 | 0.81 (6) | 0.80 (9) |
| 20Zn-1000 | 99.4 (9)                         | -            | -             | -                 | 0.57 (6) | -        |
| 20Zn-1100 | 99.4 (9)                         | -            | -             | -                 | 0.57 (6) | -        |

**Table S2.** Structural parameters of the  $\beta$ -TCP phase obtained by Rietveld refinements.

| Samples   | $\beta$ -TCP structural parameters |             |                       |                         |                         |                                                                             |
|-----------|------------------------------------|-------------|-----------------------|-------------------------|-------------------------|-----------------------------------------------------------------------------|
|           | $a$ (Å)                            | $c$ (Å)     | $V$ (Å <sup>3</sup> ) | Zn Occ<br>in<br>Ca4 (*) | Zn Occ<br>in<br>Ca5 (*) | Refined composition                                                         |
| 00Zn-500  | -                                  | -           | -                     | -                       | -                       | -                                                                           |
| 00Zn-600  | 10.4313 (8)                        | 37.329 (4)  | 3517.6 (5)            | -                       | -                       | Ca <sub>3</sub> (PO <sub>4</sub> ) <sub>2</sub>                             |
| 00Zn-700  | 10.4209 (3)                        | 37.3486 (9) | 3512.47 (2)           | -                       | -                       | Ca <sub>3</sub> (PO <sub>4</sub> ) <sub>2</sub>                             |
| 00Zn-800  | 10.4260 (2)                        | 37.3689 (8) | 3517.85 (9)           | -                       | -                       | Ca <sub>3</sub> (PO <sub>4</sub> ) <sub>2</sub>                             |
| 00Zn-900  | 10.4188 (5)                        | 37.3670 (2) | 3512.82 (9)           | -                       | -                       | Ca <sub>3</sub> (PO <sub>4</sub> ) <sub>2</sub>                             |
| 00Zn-1000 | 10.4091 (2)                        | 37.3680 (6) | 3506.95 (8)           | -                       | -                       | Ca <sub>3</sub> (PO <sub>4</sub> ) <sub>2</sub>                             |
| 00Zn-1100 | -                                  | -           | -                     | -                       | -                       | -                                                                           |
| 15Zn-500  | 10.437 (2)                         | 37.209 (6)  | 3510 (1)              | -                       | -                       | Ca <sub>3</sub> (PO <sub>4</sub> ) <sub>2</sub>                             |
| 15Zn-600  | 10.3816 (8)                        | 37.233 (3)  | 3475.2 (5)            | 28 (13)                 | 30 (11)                 | Ca <sub>2.8(1)</sub> Zn <sub>0.2(1)</sub> (PO <sub>4</sub> ) <sub>2</sub>   |
| 15Zn-700  | 10.3887 (2)                        | 37.290 (1)  | 3485.4 (1)            | 0 (-)                   | 37 (5)                  | Ca <sub>2.90(2)</sub> Zn <sub>0.10(2)</sub> (PO <sub>4</sub> ) <sub>2</sub> |
| 15Zn-800  | 10.3976 (1)                        | 37.3250 (5) | 3494.57 (7)           | 0 (-)                   | 44 (3)                  | Ca <sub>2.90(2)</sub> Zn <sub>0.10(2)</sub> (PO <sub>4</sub> ) <sub>2</sub> |
| 15Zn-900  | 10.3966 (3)                        | 37.332 (1)  | 3494.5 (2)            | 38 (6)                  | 24 (6)                  | Ca <sub>2.82(2)</sub> Zn <sub>0.18(2)</sub> (PO <sub>4</sub> ) <sub>2</sub> |
| 15Zn-1000 | 10.3842 (5)                        | 37.334 (2)  | 3486.5 (3)            | 50 (-)                  | 0 (-)                   | Ca <sub>2.86(-)</sub> Zn <sub>0.14(-)</sub> (PO <sub>4</sub> ) <sub>2</sub> |
| 15Zn-1100 | 10.3842 (5)                        | 37.340 (2)  | 3484.1 (3)            | 50 (-)                  | 0 (-)                   | Ca <sub>2.86(-)</sub> Zn <sub>0.14(-)</sub> (PO <sub>4</sub> ) <sub>2</sub> |
| 20Zn-500  | 10.422 (2)                         | 37.22 (1)   | 3501 (2)              | -                       | -                       | Ca <sub>3</sub> (PO <sub>4</sub> ) <sub>2</sub>                             |
| 20Zn-600  | 10.3813 (7)                        | 37.214 (4)  | 3473.3 (5)            | 50 (-)                  | 0 (-)                   | Ca <sub>2.86(-)</sub> Zn <sub>0.14(-)</sub> (PO <sub>4</sub> ) <sub>2</sub> |
| 20Zn-700  | 10.3799 (3)                        | 37.257 (1)  | 3476.3 (2)            | 22 (5)                  | 52 (4)                  | Ca <sub>2.79(2)</sub> Zn <sub>0.21(2)</sub> (PO <sub>4</sub> ) <sub>2</sub> |
| 20Zn-800  | 10.3960 (1)                        | 37.3243 (6) | 3493.47 (9)           | 30 (5)                  | 39 (4)                  | Ca <sub>2.78(2)</sub> Zn <sub>0.22(2)</sub> (PO <sub>4</sub> ) <sub>2</sub> |
| 20Zn-900  | 10.4119 (4)                        | 37.337 (1)  | 3505.3 (2)            | 50 (-)                  | 0 (-)                   | Ca <sub>2.86(-)</sub> Zn <sub>0.14(-)</sub> (PO <sub>4</sub> ) <sub>2</sub> |
| 20Zn-1000 | -                                  | -           | -                     | -                       | -                       | -                                                                           |
| 20Zn-1100 | -                                  | -           | -                     | -                       | -                       | -                                                                           |

\* Zn occupancy (i.e. calcium substitution) in the Ca4 and Ca5 crystallographic site of the  $\beta$ -TCP structure.
